# Supplementary material
Source: PubMed Central journal article supplement (PMC3752257)
Supplement: 1302642110_pnas.201302642SI.pdf [file 1302642110_pnas.201302642SI.pdf]

# Supporting Information

Hughes et al. 10.1073/pnas.1302642110

## SI Materials and Methods

**Data Collection.** All research articles were identified using ISI Web of Knowledge, Google Scholar, individual journal websites, and hard-copy publications. Electronic copies of data matrices were obtained from supplementary materials, standard repositories, or the original authors. Where electronic versions were unavailable, the data were transferred from .pdf to .nexus format semimanually and read into PAUP\* 4.0 (1), from which a tab-delimited text file was exported.

We initially selected studies that (i) contained phylogenies derived from discrete morphological character data and (ii) contained extinct metazoan taxa. As far as possible, we selected the most inclusive and most recent studies addressing the relationships of the taxa within. We ensured that our datasets were not derivatives or subsets of one another, containing significantly overlapping sets of characters or taxa. A total of 91 publications (2–92) contained data suitable for our main disparity analysis. These either (i) comprised solely extinct taxa or (ii) could be dynamically pruned in such a way (*Taxonomic Resolution*, below) that all remaining taxa were extinct or relict and represented monophyla (Dataset S1). For two datasets we chose to use paraphyletic groups [Theropoda excluding Avialae (40), because we wished to focus on nonavian dinosaurs (93) and cladid crinoids excluding other Articulata (34)]. Data were obtained for an additional 53 living groups with disparity profiles that were truncated by the Recent (94–143). Statistics for these clades are included for comparison, but they did not contribute to the bulk of our conclusions, hence the stated sample size of 98 rather than 151.

The 91 publications in our core sample yielded data for 98 independent groups spanning the entire Phanerozoic. Four papers (20, 27, 34, 56) yielded data for more than one independent clade (Dataset S1). Of the 91 papers, just 7 had previously been used to produce empirical morphospaces, and the remaining 84 had never been used in this way. For all terminals or operational taxonomic units (OTUs) in all datasets we then determined ages of first and last fossil occurrences. Ranges were thereby coded to the stratigraphic resolution of stages, based on the 2009 International Stratigraphic Chart (144, 145). Because most of the original datasets were constructed to address phylogenetic questions, the majority required some moderation before analysis (see below).

**Use of Discrete Rather Than Continuous Characters.** We have used matrices of discrete characters rather than continuous ones for four reasons. First, there are many discrete matrices available in the literature, representing a largely untapped resource for meta-analysis. Second, they provide us with a sample large enough to make generalizations about disparity patterns through time. Third, they allow us to implement analyses with a unified set of methods, thereby making comparisons across a disparate sample of groups. Fourth, higher taxa tend to contain species with a wide variety of forms, such that it can become difficult to recognize all but a limited suite of homologous landmarks or code more than a degenerate set of continuous characters across all constituent species. Discrete characters offer a means by which to capture wider variations in form under these circumstances. However, we note that in other studies where disparity has been estimated using both continuous and discrete characters for the same sets of taxa, the results can be in marked agreement (146).

**Taxonomic Resolution.** For many datasets, it was necessary to remove outgroups. This was because cladistic matrices are often constructed by consistently sampling the ingroup, but with

piecemeal or subsequent additions of outgroup taxa. Outgroups were therefore removed for any of three reasons: (i) The outgroup OTUs did not constitute a recognized monophyletic clade with the ingroup (i.e., there were missing taxa between the ingroup and outgroup); (ii) the outgroup OTUs were sampled at a higher taxonomic level than the ingroup; or (iii) less than 50% of the outgroup OTUs were sampled, albeit at the same taxonomic level as the ingroup. In practice, outgroups were usually excluded for the second and third reasons. Retaining both classes of outgroup would have the effect of comparatively undersampling both taxonomic and morphological variation in those lineages of the total clade closest to its root. In some datasets, we also had to overcome inhomogeneity of sampling within the ingroup (e.g., some lineages were sampled at the familial level, whereas others were sampled at the ordinal level). This is problematic for variance-based indices of disparity (e.g., the sum of the variances on the axes of the ordination). Disproportionate sampling and splitting of some groups relative to others would result in a reduction of apparent variance and a shift in the centroid of the empirical morphospace toward those more intensively sampled groups. Conventional taxonomic ranks only offer a first approximation to a more even sampling strategy, but where genera are coded alongside classes (for example) it is unlikely that the sampling is unbiased with respect to either morphological or taxonomic diversity.

We first assigned OTUs to the taxonomic ranks intended by the original authors of each dataset. For example, although an author may have coded 50 named species, these may actually have been selected as exemplars of 50 genera, 50 families, or 50 taxa of some higher rank. If this was not stated explicitly in the source materials, we inferred the sampling regime with reference to the author's contemporaneous papers, or (failing this) with reference to the most congruent available taxonomic scheme. We then determined the efficiency with which this sampling scheme encoded the total number of taxa known to exist at that level. Initially we sought datasets of three types: (i) those containing all known OTUs; (ii) those not containing all OTUs but where the author gave explicit justification for their omission (e.g., uncertain assignment to the group or poor preservation); and (iii) those not adhering to a specific taxonomic scheme, but sampling OTUs with the express intention of capturing variation in morphology within the clade (93). In addition, we included datasets with less even sampling, provided we were able to amalgamate OTUs in such a way as to render them homogeneous at some higher taxonomic level. For example, if a dataset contained 20 genera, 10 of which were unique exemplars of 10 different families and 10 of which were exemplars of the same (11th) family, then we amalgamated the codes for the latter 10 genera to yield a dataset for (effectively) 11 families. Character amalgamation used modal states. Stratigraphic data were amalgamated using the oldest and youngest exemplars (total range). If our hypothetical 11 families represented all of those known within an inclusive clade (or order, in taxonomic terms), then the dataset was deemed to be effectively complete at the family level. Datasets of between 50% and 100% completeness were included provided that the coded OTUs offered reasonably even coverage of the more inclusive group. Where coverage was less than this or manifestly uneven (unless the author gave good reasons why additional OTUs were not included, for example, poor preservation or uncertain affinity to the clade in question), we amalgamated exemplars to the next highest taxonomic level. Where a dataset contained two clades, each sampled homogeneously but at two different taxonomic levels, it was split into two subclades. For example, the data set of

Carlson and Fitzgerald (27) contained two clades, one of 49 homogeneously sampled genera, the other of 20 homogeneously sampled genera. Where homogeneously sampled clades were nested within larger inhomogeneously sampled clades, OTUs were pruned from the dataset until only the homogenous clade remained. Pruning was required in 19 of our 98 datasets (Dataset S1). All preanalytical modifications to the data were implemented in Excel, and all morphological condensing was conducted in the software environment R (147) using a script written by the authors.

A potential concern was that any putative pattern of disparity profiles through time might result from the analysis of clades of markedly different taxonomic rank. For example, many metazoan phyla originate in the Cambrian and most of those that do not are without a fossil record (148). It follows that clades of higher rank and longer duration are more likely to originate in older intervals, whereas clades of genera and families (for example) can potentially originate at any time. Some of this potential bias was mitigated by the stipulation that clades must be extinct; many higher taxa not only originated in older strata but were of high diversity in the Recent, and were consequently disqualified. From our sample of 98 clades, only three spanned from the Paleozoic to the Cenozoic. Our sampling therefore preferentially selected taxa of intermediate and lower rank (orders and families). We nonetheless tested for a relationship between clade age and clade rank (Fig. S1).

Taxonomic ranks are only comparable in the very broadest terms across different metazoan groups, but we proceeded by coding subfamilies as rank one, families as rank two, superfamilies as three, up through ranks of infraorders, orders, superorders, subclasses, classes, and subphyla at rank nine. We then computed Spearman's rank correlation between taxonomic rank and the age of clade origination; this revealed a weak but significant relationship ( $\rho = -0.228$ ,  $P = 0.024$ ) (Fig. S1). However, when we calculated clade age as the age of its CG, the correlation between taxonomic rank and age was even weaker and no longer significant ( $\rho = -0.161$ ,  $P = 0.113$ ). More importantly, we tested for a relationship between taxonomic rank and CG but found no significant correlation ( $\rho = -0.027$ ,  $P = 0.791$ ) (Fig. S2A). We also found no difference between the median CGs for clades partitioned into familial (subfamilies, families, and superfamilies), ordinal (infraorders, orders, and superorders), and higher (subclasses, classes, subphyla, and phyla) taxonomic groups (Kruskal–Wallis test;  $\chi^2 = 0.292$ ,  $P = 0.864$ ). Hence, even if higher-ranking clades were preferentially sampled from older strata, this could not bias disparity profile shapes in and of itself. We also note that there was no significant correlation between clade CG and the number of OTUs as a proxy for clade size ( $\rho = 0.063$ ,  $P = 0.535$ ) (Fig. S2B), or between clade CG and duration of the clade ( $\rho = -0.139$ ,  $P = 0.172$ ) (Fig. S2C). Finally, we modeled CG as a linear function of  $\ln(\text{number of OTUs}) + \ln(\text{taxonomic level of clade}) + \ln(\text{duration of clade in Myrs}) + \text{date of clade origin} + \text{taxonomic group (vertebrate or invertebrate)} + \text{demise of clade at mass extinction (yes or no)}$ . The only significant variable in the full model [and the only variable retained in the minimum adequate model using the Akaike information criterion (AIC);  $P < 0.001$ ] was the last of these: whether or not a clade went extinct coincident with a mass extinction.

**Stratigraphic Resolution.** After effective taxonomic ranks were ascribed to all OTUs in a matrix, stratigraphic ranges were assigned to reflect that ranking. We used the International Stratigraphic Chart 2009 (144, 145), offering a maximum resolution of 100 stages. First and last occurrences were determined at the maximum possible precision for each OTU. Taxa were assumed to persist uninterrupted between these dates. Stratigraphic range data were sourced from the Paleobiology Database (<http://paleodb.org/>), Sepkoski Online (149), *The Fossil Record 2* (150), and from other published sources (37, 57, 63, 86, 92, 151–173), including the papers containing the morphological data matrices. Ranges for higher taxa were determined by searching for those taxa directly

and by searching for all constituent taxa within them. In general, we coded the maximum duration for a given OTU. If no stratigraphic data could be found for a given OTU (and there was no evidence to suggest that it was extant) then it was noted and removed before analysis. Unranked OTUs (*incertae sedis*) were dated individually. Stratigraphic ranges for each OTU were formatted as binary matrices of absences and presences. Data taken from the Paleobiology Database and Sepkoski Online were formatted into a stratigraphic matrix using a Perl script written by Anne O'Connor, University of Bath. The script produced the binary matrix by cross-referencing the OTUs in a dataset with a reference list of taxa and dates extracted from both databases. First and last occurrences were then checked manually against other published sources. Clades were plotted according to their first occurrences.

**Character Coding.** Characters were coded as found in the source paper. If OTUs were to be condensed as a result of uneven sampling, character states were merged in the following way. (i) Where there was no character state conflict resulting from the condensing, no action was taken. (ii) If the character states conflicted between OTUs, we assigned the state most frequently observed within the rest of the matrix. A total of 33 studies (36 clades) contained information on the ordering of character data. For these studies the analysis was run twice to see what effect these orderings had on the disparity curves and center of gravity estimates. Fig. S3 demonstrates that these differences were undetectable; the correlation of center of gravity (CG) values (corrected for intrinsic bias) for ordered and unordered analyses across our 36 clades was extremely high (high ( $\rho = 0.997$ ,  $P < 0.001$ )). Unordered data were therefore used for all further analyses, and are the basis of the results presented elsewhere. Polymorphic character codes constituted only 1.5% of all data cells. As a conservative approach, they were treated as NA before condensing taxa. Missing and/or gap state data were more prevalent. However, even at its highest concentration, it was possible to calculate pairwise distances between almost all of the taxa in all of our matrices. In cases where the condensation of taxa rendered some characters invariant, these were deleted before analysis.

**Intertaxon Distance Matrices and Ordination.** The above procedures resulted in one morphological character matrix and one stratigraphic presence/absence file for each of our 98 clades. All subsequent analyses were conducted within R using scripts written by S.G. and M.H. We first generated a generalized Euclidean distance matrix (174) between all pairs of OTUs. For each pair of OTUs, the difference between each comparable character state was squared, these differences summed, divided by the total number of comparable states, then square-rooted (174). A small number of morphological matrices contained one or two pairs of OTUs for which no characters were coded in common (hence it was impossible to calculate a distance between them). In these cases, the most data-deficient OTU was removed and the distances recalculated (repeated as necessary) until there were distance measures for all pairs of OTUs in the matrix. Distance matrices were ordinated using principal coordinates analysis (175) and implementing Cailleux's correction for negative and uninformative eigenvalues (176). Because scores on all coordinates were used to calculate disparity (as the sum of the univariate variances), the ordination step was primarily for visualization purposes. All distances in the ordinations (and the disparity indices inferred from them) were in precise proportion to those calculated directly from the raw character data. Nonmetric multidimensional scaling (20, 177) was not chosen because we wished to retain the metric properties of our distance matrices (178).

**Quantifying Disparity.** We used the sum of variance index of disparity throughout (179). This was favored because of its relative insensitivity to sample-size differences and its complete indifference

to the orientation of the coordinate axes upon which it is being calculated. The first property is useful because the number of OTUs sampled can be highly variable through time, and because larger samples will tend to have a wider distribution within their character space. Uncorrected measurements of range are sensitive to these changes in sample size, to the extent that they may largely reflect proxies of diversity. The second property is useful because although the orientation of the ordination is derived from all taxa simultaneously, taxa within a given time bin are almost invariably some subset of these. Were these subsets to have been ordinated independently, the orientation of axes would very likely have been different. Disparity was calculated for all time intervals over which each clade persisted. One thousand bootstrap replicates (180) were used at each interval to produce estimates of mean and SE. Stratigraphic resolution was to the stage, epoch, or period level depending upon the size and duration of the clade (with between 5 and 15 time intervals per clade).

**Classifying Disparity Profiles.** Disparity profiles were categorized according to the CG metric (181, 182). This was used to distinguish between those clades whose temporal mean disparity was located early (bottom-heavy), late (top-heavy), or in the middle of their evolutionary history (symmetrical). The center of gravity in absolute time ( $CG_m$ ) was calculated as

$$CG_m = \sum d_i t_i / \sum d_i,$$

where  $d_i$  is the disparity at the  $i$ th stratigraphic interval and  $t_i$  the temporal midpoint in absolute time (millions of years) of the  $i$ th stratigraphic interval. This was then scaled between the ages of the oldest ( $t_{oldest}$ ) and youngest ( $t_{youngest}$ ) intervals to yield an index of observed  $CG_m$  ( $CG_{scaled}$ ) between 0 and 1:

$$CG_{scaled} = \frac{t_{oldest} - CG_m}{t_{oldest} - t_{youngest}}.$$

The expected value of  $CG_{scaled}$  for a clade of constant disparity through time is not necessarily 0.50, but rather is determined by the durations of the time bins over which the profile was measured. This is because stratigraphic stages are not of uniform duration, nor are taxa invariably dated to series and stages. Hence, we compared the observed  $CG_{scaled}$  with the inherent CG ( $CG_i$ ) for a hypothetical clade of uniform disparity spanning the same intervals. A bootstrapping test was used to determine when this deviation was significant [clades for which >97.5% of 1,000 bootstrapped replicates lay either above or below the center of gravity inherent in the timescale ( $P$  value <0.05)] (179). Finally, we adjusted the observed  $CG_{scaled}$  relative to  $CG_i$  as a baseline, hereafter referred to as simply CG.

For profiles of diversity through time, standard birth/death models of clade evolution on a regular time scale predict a mean CG of 0.5 (181, 183, 184). However, there is no analogous model for profiles of disparity through time. Many clade histories are characterized by early periods of (variously rapid) radiation and morphological diversification, but new forms must be generated by branching cladogenesis (and so clades must explore the design space progressively at some level of temporal resolution). The extinction of OTUs may also be highly selective, affecting branches in a progressive manner that reflects the structure of the tree. However, extinction can also be effectively random with respect to both the tree and the morphospace, which would tend to leave variance-based indices of disparity largely unaffected (179). We note that any model in which the random extinction of lineages is a significant factor is likely to yield top-heavy clades as a null expectation. Our use of an effective CG of 0.5 as our null is defensible in this context because we believe it to be biased against our finding more significantly bottom-heavy than top-

heavy clades (a principal conclusion of this paper). It is also defensible empirically based on our sample. The median CG of our 98 clades (corrected for intrinsic bias) was 0.501, which is indistinguishable from 0.500 ( $V = 2,429$ ,  $P = 0.992$ ).

Clades can only become more diverse through the progressive branching of lineages but may become less diverse because of extinctions that may be either selective (large branches) or effectively random. It is therefore noteworthy to find clades that exhibit early levels of disparity that are indistinguishable from the maximum disparity later achieved by the clade. Hence, we developed an ancillary test for those clades that were initially indistinguishable from symmetrical. The disparity profile of the clade was reconstructed using 1,000 bootstraps of all of the OTUs in the dataset. For each replicate curve, the difference in disparity between the first/second stage and the disparity maximum after the first/second stage was calculated, yielding a distribution. If a difference of zero was within the 95% limits of this distribution, we were unable to reject the null hypothesis of no difference between the initial disparity and the maximum achieved by the clade. In such cases, maximal disparity was achieved in the first stages of the clade's evolutionary history. A similar test was applied to the end of each group's history.

Finally, we implemented a test to determine whether early or late disparity was greater than the disparity we would expect for a similar number of taxa sampled from the entire history of the group (174). The null here was that taxa occupy morphospace at random with respect to our sample of empirically realized forms. This was a much more promiscuous null than we believe to be the case (again, taxa evolve through branching cladogenesis). To reject it and report early high disparity, the early colonizers of the morphospace must be significantly more disparate than the random samples (an extremely difficult test to pass). Unsurprisingly, only seven and eight datasets had early and late disparity (respectively) higher than random according to this test.

**Stratigraphic Resolution Within Clades.** The analysis of all 98 clades was run with temporal bins of three different sizes (stages, epochs, and periods). For each of these bin sizes, disparity profiles were categorized as described above. In a small number of cases, it became necessary to use more inclusive categories than geological periods. Specifically, the Paleozoic was partitioned into Early Paleozoic (Cambrian/Ordovician) and Late Paleozoic (Silurian–Permian) (182). Other treatments of the Paleozoic (retaining a single interval or splitting it into two bins comprising either equal numbers of epochs or with equal durations) were also implemented but made negligible difference to the overall results. The choice of stratigraphic resolution was otherwise important because not all clades had the same duration (those in our dataset had a mean duration of 15 stages or 90 million years and a SD of 12 stages or 69 million years). There was a balance between sampling at a higher temporal resolution on one hand and sampling more OTUs within each time bin on the other hand. Attempting to use too many stratigraphic subdivisions potentially results in problematic levels of noise, prohibitively large error bars, and larger numbers of intervals containing just one or no OTUs. In practice, the preferred binning regime yielded between 5 and 15 intervals. The paucity of top-heavy clades in the Cenozoic was partly a function of using entirely extinct groups. Many datasets of Cenozoic fossil taxa contained extant representatives and could not be pruned to yield an exclusively extinct subclade.

**Removing the Immediate Effects of Mass Extinction.** Clades terminating at mass extinction boundaries might be shaped significantly by those extinction events. Specifically, a mass extinction might truncate a clade that would otherwise have obtained a symmetrical or bottom-heavy profile of disparity through time. Such extinction-terminated clades might be expected to be flat-topped to some degree, and therefore have a potentially higher CG than

otherwise. To remove the most immediate of these effects, we reduced our sample to include only those clades not terminating at one of the big five mass extinction boundaries, namely the End Ordovician (443.7 Ma), the Late Devonian (Frasnian/Famennian boundary 374.5 Ma), the End Permian (251 Ma), the End Triassic (199.6 Ma), and the End Cretaceous (65.5 Ma). We note that broader definitions are possible for the End Ordovician and Late Devonian events, but these had no effect upon any of our statistics. A clade was deemed to terminate at a mass extinction if at least one of its constituent OTUs went extinct at the boundary but none persisted thereafter. The 35 clades terminating at a mass extinction had a mean CG significantly greater than 0.5 ( $t = 3.901$ ,  $P < 0.001$ ) (i.e., they were top-heavy on average). Those not terminating at a mass extinction had a mean CG significantly less than 0.5 ( $t = -2.420$ ,  $P = 0.018$ ), and were therefore bottom-heavy on average. Unsurprisingly, the two distributions also had significantly different medians ( $t = 4.382$ ,  $P < 0.001$ ).

**Comparing the Distribution of Clade Disparity Profiles Within the Largest Time Bins.** We first compared the frequencies of top- and bottom-heavy clade profiles in the four largest time bins (Early Paleozoic, Late Paleozoic, Mesozoic, and Cenozoic), irrespective of whether these were significant or not. A log likelihood ratio test applied to a  $2 \times 4$  contingency table of all 98 clades retained the null of similar distributions within these bins ( $G = 2.298$ ,  $\chi^2$  df = 3,  $P = 0.513$ ). We then counted only those clades for which our bootstrapping test allowed us to reject the null hypothesis of symmetry, yielding another  $2 \times 4$  contingency table, albeit with a smaller total sample size. Again, a log likelihood ratio test retained the null of similar distributions within the four time bins ( $G = 3.558$ ,  $\chi^2$  df = 3,  $P = 0.313$ ).

A similar suite of tests was run on only that subset of 63 clades that did not terminate at a mass extinction event. None of these revealed significant differences between Early Paleozoic, Late Paleozoic, Mesozoic, or Cenozoic time bins, irrespective of how the data were partitioned. The partition into clades with CGs above and below 0.5 ( $G = 3.461$ ,  $\chi^2$  df = 3,  $P = 0.326$ ) and with CGs significantly above and below 0.5 ( $G = 3.943$ ,  $\chi^2$  df = 3,  $P = 0.268$ ) revealed no significant differences.

**Comparing the Distribution of Clade Disparity Profiles Terminating at Mass Extinctions with Those Not.** Of the 35 clades that terminated at a mass extinction, 24 had a CG  $>0.5$ . However, of the 63 clades that terminated at other times, just 25 had a CG  $>0.5$ . A likelihood ratio test revealed that these profile frequencies were significantly different ( $2 \times 2$  contingency table, log likelihood test;  $G = 7.519$ ,  $\chi^2$  df = 1,  $P = 0.006$ ). A similar difference was observed for significantly top- and bottom-heavy clades. Thirteen from 17 significantly asymmetrical clades terminating at a mass extinction were top-heavy, whereas just 6 from 25 significantly asymmetrical clades terminating at other times were top-heavy (Fig. S4) ( $G = 12.553$ ,  $\chi^2$  df = 1,  $P < 0.001$ ).

**Comparing the CG Distribution of Clades Radiating in the Wake of Mass Extinctions with Those Not.** If early high disparity was the result of ecospace clearing in the wake of mass extinctions, then we might expect clades originating immediately after one of the big five events to have a lower median CG than those originating at other times. There were just 12 extinct clades originating in the first stage after a mass event, and 17 in the first two stages. These both showed distributions of median CG values indistinguishable from those of clades originating at other times ( $W = 693$ ,  $P = 0.970$ ;  $W = 468$ ,  $P = 0.608$ ).

### Ancillary Analyses

**Comparison of "Cladistic" and "Phenetic" Source Matrices.** The majority of the discrete matrices analyzed in this study had been used in other contexts to infer phylogeny (hereafter "cladistic"

matrices). A small minority were not prepared with this purpose in mind (hereafter "phenetic" matrices, in the absence of a better term). Do cladists code characters differently from those researchers not intending to derive a tree? In particular, do cladists "filter" potential characters more stringently than pheneticists, applying more rigorous criteria of operational homology and thereby rejecting sources of variation that would be legitimate within analyses of morphological disparity?

All morphological data sets—whether intended for phylogenetic purposes or otherwise—necessarily sample a subset of the available universe of possible characters. Moreover, many pheneticists used concepts of homology for discrete characters that differed little from the operational definitions used by cladists (i.e., those of close compositional and relational similarity). Hence, even if rich seams of discrete phenetic data matrices were available in the literature (which, unfortunately, they are not), we believe that these would be largely similar in quality and nature to most cladistic matrices. Most pheneticists do not, for example, code states believed to be blatant analogies (wings of birds, bats, and bees) as the same state. They might, perhaps, take greater license with characters than some cladists, but this is a difference of degree rather than one of principle. By the same token, nearly all cladistic matrices contain homoplasy, and many of them retain characters that map onto globally optimal trees without supporting any nonterminal branches (i.e., they map with the maximum possible number of changes). Such characters are typically retained, even though their homology is implicitly rejected by the rest of the data.

In fact, we suspect that many cladistic matrices are more promiscuous in terms of the sampled characters than many phenetic ones. Certainly, the former are often typified by a higher ratio of characters to taxa than phenetic matrices, which is borne out in our (admittedly very modest) sample (Fig. S4). One could go a step further and include functional characters. However, such data have greater utility for investigating functional variety rather than morphological variety and disparity as usually conceived. We deliberately excluded a number of otherwise excellent datasets from our analyses for precisely this reason.

For comparison, we have analyzed the small number of discrete phenetic matrices within our sample of 98 datasets as although they were intended for phylogenetic inference, subsequently calculating the homoplasy excess ratio (HER) (185–187) for these and the other matrices in our study. The HER is relatively unbiased by dataset dimensions [unlike the ensemble consistency index (CI) and retention index (RI)]. Calculating the HER requires an estimate of the mean tree length for a large number of datasets (here 500) in which the assignment of states within characters (but across taxa) has been randomized. For this, we used a TNT (188) script implementing `xperm` followed by `xmult level 10` searches. The latter (in the absence of further `bb` searches) is very unlikely to find the full set of optimal trees but is guaranteed to find some of them (and hence the true optimal tree length, which is all that is needed within the HER calculation). The results indicate no difference in the median HER for cladistic and phenetic datasets ( $W = 323$ ,  $P = 0.917$ ). Hence, our cladistic matrices sample greater numbers of characters (relative to the number of taxa in the matrix) than their phenetic counterparts. However, coded cladistic and phenetic characters are indistinguishable in terms of their conflict with one another and the amounts of homoplasy that they introduce. Hence, there is no evidence (on the grounds of our admittedly modest sample) that cladists use more stringent criteria of operational homology, causing them to reject characters that others might accept.

**How Closely Do Observed Intertaxon Distances Approach the Maximum Possible for a Given Dataset?** Do clades reach early high disparity because they have exploited the extremes of their coded character spaces (189), or is there room for morphological expansion

throughout their histories? We addressed this simply for each of our datasets by comparing the maximum distance between taxa with the empirical distribution of all possible intertaxon distances. Where all characters are unordered, the maximum theoretical Euclidean distance between taxa was given simply by the square root of the number of characters. This was compared with the distribution of  $(N^2 - N)/2$  empirically observed distances between  $N$  taxa to determine whether any observed intertaxon distances reached the theoretical maximum. We note that this contingency only implied that disparity had reached its theoretical limit where one or more observed maximum distances were between taxa

from the same time bin. Taxa might otherwise migrate through the character space, such that no individual time bin would contain taxa as distant as the theoretical maximum.

Of our 98 “extinct” and 53 “living” matrices, only 2 (18, 38) contained an empirical distance as great as the theoretical maximum. However, in neither of these cases were the maximum empirical distances observed between taxa within the same time bin. One of these had a significantly top-heavy CG, and the other was symmetrical. In these two cases, at least, character saturation (if it occurs) did not yield a low CG. We conclude that character-state saturation is not a significant problem in our analyses.

- Swofford DL (2003) *PAUP\*: Phylogenetic Analysis Using Parsimony (\*and Other Methods) Version 4* (Sinauer, Sunderland, MA).
- Lü J, Unwin DM, Jin X, Liu Y, Ji Q (2010) Evidence for modular evolution in a long-tailed pterosaur with a pterodactyloid skull. *Proc Biol Sci* 277(1680):383–389.
- Longrich N, Sankey J, Tanke D (2010) *Texacephale langstoni*, a new genus of pachycephalosaurid (Dinosauria: Ornithischia) from the upper Campanian Aguja Formation, southern Texas, USA. *Cretac Res* 31(2):274–284.
- López-Arbarello A, Zavattieri A (2008) Systematic revision of *Pseudobeaconia* Bordas, 1944, and *Mendocinichthys* Whitley, 1953 (Actinopterygii: ‘Perleidiformes’) from the Triassic of Argentina. *Palaeontology* 51(5):1025–1052.
- Lamsdell JC, Braddy SJ, Tetlie OE (2010) The systematics and phylogeny of the Stylonurina (Arthropoda: Chelicerata: Eurypterida). *J Syst Palaeontology* 8(1):49–61.
- Lee SB, Lee DC, Choi DK (2008) Cambrian–Ordovician trilobite family Missisquoiidae Hupé, 1955: Systematic revision and palaeogeographical considerations based on cladistic analysis. *Palaeogeogr Palaeoclimatol Palaeoecol* 260(3):315–341.
- Huguet A, Nel A, Martinez-Deldos X, Bechly G, Martins-Neto R (2002) Preliminary phylogenetic analysis of the Protanisoptera (Insecta: Odonatoptera). *Geobios* 35(5): 537–560.
- Jiang DY, et al. (2008) First record of Placodontoidea (Reptilia, Sauropterygia, Placodontia) from the eastern Tethys. *J Vertebr Paleontol* 28(3):904–908.
- Gaffney ES, Tong H, Meylan PA (2006) Evolution of the side-necked turtles: The families Bothremyidae, Euraxemyidae and Araripemyidae. *Bull Am Mus Nat Hist* 300:1–698.
- Gebauer E (2007) Phylogeny and evolution of the gorgonopsia with a special reference to the skull and skeleton of GPIT/RE/7113 (*Aelurognathus? parringtoni*). Dissertation (Universitätsbibliothek Tübingen, Germany). Available at <http://tobias-lib.uni-tuebingen.de/volltexte/2007/2935>. Accessed March 7, 2011.
- Hill R, Witmer L, Norell M (2003) A new specimen of *Pinacosaurus grangeri* (Dinosauria: Ornithischia) from the Late Cretaceous of Mongolia: Ontogeny and phylogeny of ankylosaurs. *Am Mus Novit* 3395:1–29.
- Egi N, et al. (2005) Provirverine Hyaeonodontids (Creodonta: Mammalia) from the Eocene of Myanmar and a phylogenetic analysis of the provirverines from the Para-tethys area. *J Syst Palaeontology* 3(4):337–358.
- Engel MS, Grimaldi DA, Krishna K (2009) Termites (Isoptera): Their phylogeny, classification, and rise to ecological dominance. *Am Mus Novit* 3650:1–27.
- Chatterton B, Edgcombe G, Waisfeld B, Vaccari N (1998) Ontogeny and systematics of Toernquistiidae (Trilobita, Proetida) from the Ordovician of the Argentine Precordillera. *J Paleontol* 72(2):273–303.
- Brusatte SL, et al. (2010) Tyrannosaur paleobiology: New research on ancient exemplar organisms. *Science* 329(5998):1481–1485.
- Bloch JJ, Silcox MT, Boyer DM, Sargis EJ (2007) New Paleocene skeletons and the relationship of plasiadapiforms to crown-clade primates. *Proc Natl Acad Sci USA* 104(4):1159–1164.
- Alvarez F, Yu RJ, Boucot AJ (1998) The classification of athyridid brachiopods. *J Paleontol*, 72(5):827–855.
- Adrain J, Chatterton B, Kloc G (2008) Systematics of the koneprusine trilobites, with new taxa from the Silurian and Devonian of Laurentia. *J Paleontol* 82(4):657–675.
- Allain R, Aquesbi N (2008) Anatomy and phylogenetic relationships of *Tazoudasaurus naimi* (Dinosauria, Saurpoda) from the late Early Jurassic of Morocco. *Geodiversitas* 30(2):345–424.
- Anderson PSL, Friedman M, Brazeau MD, Rayfield EJ (2011) Initial radiation of jaws demonstrated stability despite faunal and environmental change. *Nature* 476(7359): 206–209.
- Anderson JS, Reisz RR, Scott D, Fröbisch NB, Sumida SS (2008) A stem batrachian from the Early Permian of Texas and the origin of frogs and salamanders. *Nature* 453(7194):515–518.
- Bajpai S, et al. (2008) The oldest Asian record of Anthrozoidea. *Proc Natl Acad Sci USA* 105(32):11093–11098.
- Bates DEB, Kozłowska A, Lenz AC (2005) Silurian retiolitid graptolites: Morphology and evolution. *Acta Palaeontol Pol* 50(4):705–720.
- Bell GL, Polcyn MJ (2005) *Dallasaurus turneri*, a new primitive mosasaurid from the Middle Turonian of Texas and comments on the phylogeny of Mosasauridae (Squamata). *Geol Mijnb* 84(3):177–194.
- Bodenbender BE, Fisher DC (2001) Stratocladistic analysis of blastoid phylogeny. *J Paleontol* 75(2):351–369.
- Brusatte SL, Benton MJ, Desojo JB, Langer MC (2010) The higher-level phylogeny of Archosauria (Tetrapoda: Diapsida). *J Syst Palaeontology* 8(1):3–47.
- Carlson SJ, Fitzgerald PC (2007) Sampling taxa, estimating phylogeny and inferring macroevolution: An example from Devonian terebratulide brachiopods. *Tran R Soc Edin* 98(3):311–325.
- Carrano MT, Sampson SD (2008) The phylogeny of Ceratosauria (Dinosauria: Theropoda). *J Syst Palaeontology* 6(2):183–236.
- Cotton TJ (2001) The phylogeny and systematics of blind Cambrian ptychoparioid trilobites. *Palaeontology* 44(1):167–207.
- Clement A, Long J (2010) *Xeradipterus hatcheri*, a new dipnoan from the Late Devonian (Frasnian) Gogo Formation, Western Australia, and other new holodontid material. *J Vertebr Paleontol* 30(3):681–695.
- Cisneros JC, Ruta M (2010) Morphological diversity and biogeography of procolophonids (Amniota: Parareptilia). *J Syst Palaeontology* 8(4):607–625.
- Damiani RJ (2001) A systematic revision and phylogenetic analysis of Triassic mastodontosaurids (Temnospondyli: Stereospondyli). *Zool J Linn Soc* 133(4):379–482.
- Dupret V, Zhu M, Wang J-Q (2009) The morphology of *Yujiangolepis liujingensis* (Placodermi, Arthrodira) from the Pragian of Guangxi (south China) and its phylogenetic significance. *Zool J Linn Soc* 157(1):70–82.
- Footo M (1999) Morphological diversity in the evolutionary radiation of Paleozoic and post-Paleozoic crinoids. *Paleobiology* 25(1):1–116.
- Footo M (1992) Paleozoic record of morphological diversity in blastozoan echinoderms. *Proc Natl Acad Sci USA* 89(16):7325–7329.
- Fröbisch J (2007) The cranial anatomy of *Kombuisia frerensis* Hottot (Synapsida, Dicyonodontia) and a new phylogeny of anomodont therapsids. *Zool J Linn Soc* 150(1):117–144.
- Fortey RA, Chatterton BDE (1988) Classification of the trilobite suborder Asaphina. *Paleontology* 31(1):165–222.
- Hoffmann R (2010) New insights on the phylogeny of the Lytoceratoidea (Ammonitina) from the septal lobe and its functional interpretation. *Rev Paleobio Gen* 1(1):1–156.
- Hone D, Benton M (2008) A new genus of rhynchosaur from the Middle Triassic of south-west England. *Palaeontology* 51(1):95–115.
- Hu D, Hou L, Zhang L, Xu X (2009) A pre-*Archaeopteryx* troodontid theropod from China with long feathers on the metatarsus. *Nature* 461(7264):640–643.
- Jiménez-Sánchez A, Anstey RL, Azanza B (2010) Description and phylogenetic analysis of *Iberostomata fombuensis* new genus and species (Bryozoa, Ptilodictyina). *J Paleontol* 84(4):695–708.
- Ketchum HF, Benson RBJ (2010) Global interrelationships of Plesiosauroidea (Reptilia, Sauropterygia) and the pivotal role of taxon sampling in determining the outcome of phylogenetic analyses. *Biol Rev Camb Philos Soc* 85(2):361–392.
- Jin J, Popov L (2008) A new genus of Late Ordovician–Early Silurian pentameride brachiopods and its phylogenetic relationships. *Acta Palaeontol Pol* 53(2):221–236.
- Klug S (2010) Monophyly, phylogeny and systematic position of the Synchondotiformes (Chondrichthyes, Neoselachii). *Zool Scr* 39(1):37–49.
- Korn D (1997) Evolution of the Goniatitaceae and Viséan–Namurian biogeography. *Acta Palaeontol Pol* 42(2):177–199.
- Klembara J, Clack J, Černánský A (2010) The anatomy of palate of *Chroniosaurus dongusensis* (Chroniosuchia, Chroniosuchidae) from the Upper Permian of Russia. *Palaeontology* 53(5):1147–1153.
- Lieberman B (2001) Phylogenetic analysis of the Olenellina Walcott, 1890 (Trilobita, Cambrian). *J Paleontol* 75(1):96–115.
- Lieberman B (1998) Cladistic analysis of the Early Cambrian olenelloid trilobites. *J Paleontol* 72(1):59–78.
- Lieberman B, Kloc G (1997) Evolutionary and biogeographic patterns in the Asteropyginae (Trilobita, Devonian). *Bull Am Mus Nat Hist* 232.
- McDonald AT, et al. (2010) New basal iguanodonts from the Cedar Mountain formation of Utah and the evolution of thumb-spiked dinosaurs. *PLoS ONE* 5(11): e14075.
- Maidment S (2010) Stegosauria: A historical review of the body fossil record and phylogenetic relationships. *Swiss J Geosci* 103(2):199–210.
- Maletz J, Carlucci J, Mitchell CE (2009) Graptoloid cladistics, taxonomy and phylogeny. *Bull Geosci* 84(1):7–19.
- Maletz J, Mitchell C (1996) Evolution and phylogenetic classification of the Glossograptidae and Arienigraptidae (Graptoloidea): New data and remaining questions. *J Paleontol* 70(4):641–655.
- Mihlbachler M, Deméré T (2010) Phylogenetic status of *Metarhinus pater* (Brontotheroidea: Perissodactyla) from Southern California and species variation in *Metarhinus* from the middle Eocene of North America. *J Vertebr Paleontol* 30(4): 1229–1244.
- Milner A, Milner A, Walsh S (2009) A new specimen of *Baphetes* from Nyírany, Czech Republic and the intrinsic relationships of the Baphetidae. *Acta Zool* 90: 318–334.
- Mitchell CE (1987) Evolution and phylogenetic classification of the Diplograptacea. *Palaeontology* 30(2):353–405.

57. Novas FE, Pol D, Canale JI, Porfiri JD, Calvo JO (2009) A bizarre Cretaceous theropod dinosaur from Patagonia and the evolution of Gondwanan dromaeosaurids. *Proc Biol Sci* 276(1659):1101–1107.
58. Motani R (1999) Phylogeny of the Ichthyopterygia. *J Vertebr Paleontol* 19(3):473–496.
59. Nel A, Petrulievicius J, Martínez-Delclós X (2005) New mesozoic protomyrmeleontidae (Insecta: Odonoptera: Archizygotera) from Asia with a new phylogenetic analysis. *J Syst Palaeontology* 3(2):187–201.
60. Parker W, Irmis R (2006) A new species of the Late Triassic phytosaur *Pseudopalatus* (Archosauria: Pseudosuchia) from Petrified Forest National Park, Arizona. *Mus N Arizona Bull* 62:126–143.
61. Parker W, Stocker M, Irmis R (2008) A new Desmatosuchine Aetosaur (Archosauria: Suchia) from the Upper Triassic Tecovas formation (Dockum Group) of Texas. *J Vertebr Paleontol* 28(3):692–701.
62. Pernère V, Elliott D (2008) Phylogeny of the Pteraspidoformes (Heterostraci, Silurian–Devonian jawless vertebrates). *Zool Scr* 37(4):391–403.
63. Pollitt JR, Fortey RA, Wills MA (2005) Systematics of the trilobite families Lichidae Hawle & Corda, 1847 and Lichakephalidae Tripp, 1957: The application of Bayesian inference to morphological data. *J Syst Palaeontology* 3(3):225–241.
64. Pol D, Leardi J, Lecuona A, Krause M (2012) Postcranial anatomy of *Sebecus icaeorhinus* (Crocodyliformes, Sebecidae) from the Eocene of Patagonia. *J Vertebr Paleontol* 32(2):328–354.
65. Polly D, Wesley-Hunt G, Heinrich R, Davis G, Houde P (2006) Earliest known carnivorous auditory bulla and support for a recent origin of crown-group Carnivora (Eutheria, Mammalia). *Palaeontology* 49(5):1019–1027.
66. Polly P (1996) The skeleton of *Gazinocyon vulpeculus* Gen. et comb. nov. and the cladistic relationships of Hyaenodontidae (Eutheria, Mammalia). *J Vertebr Paleontol* 16(2):303–319.
67. Prieto-Márquez A (2010) Global phylogeny of Hadrosauridae (Dinosauria: Ornithomorph) using parsimony and Bayesian methods. *Zool J Linn Soc* 159(2):435–502.
68. Poyato-Ariza FJ, Wenz S (2002) A new insight into pycnodontiform fishes. *Geodiversitas* 24(1):139–248.
69. Ruta M, Coates MI (2007) Dates, nodes and character conflict: Addressing the lissamphibian origin problem. *J Syst Palaeontology* 5(1):69–122.
70. Prokop J, Ren D (2007) New significant fossil insects from the Upper Carboniferous of Ningxia in northern China (Palaeodictyoptera, Archaeorthoptera). *Eur J Entomol* 104(2):267–275.
71. Sansom RS (2009) Phylogeny, classification and character polarity of the Osteostraci (Vertebrata). *J Syst Palaeontology* 7(1):95–115.
72. Sampson SD, et al. (2010) New horned dinosaurs from Utah provide evidence for intracontinental dinosaur endemism. *PLoS ONE* 5(9):e12292.
73. Benedetto J (2009) Chaniella, a new Lower Tremadocian (Ordovician) brachiopod from northwestern Argentina and its phylogenetic relationships within basal rhynchonelliforms. *Paläont Z* 83(3):393–405.
74. Schoch RR (2008) A new stereospondyl from the German Middle Triassic, and the origin of the Metoposauridae. *Zool J Linn Soc* 152(1):79–113.
75. Schoch R, Milner A (2008) The intrarelationships and evolutionary history of the temnospondyl family Branchiosauridae. *J Syst Palaeontology* 6(4):409–431.
76. Sigurdson T, Bolt J (2010) The Lower Permian amphibamid *Doleserpeton* (Temnospondyli: Dissorophoidea), the interrelationships of amphibamids, and the origin of modern amphibians. *J Vertebr Paleontol* 30(5):1360–1377.
77. Smith AS, Dyke GJ (2008) The skull of the giant predatory plesiosaur *Rhomaleosaurus cramptoni*: implications for plesiosaur phylogenetics. *Naturwissenschaften* 95(10):975–980.
78. Smith ND, Pol D (2007) Anatomy of a basal sauropodomorph dinosaur from the Early Jurassic Hanson Formation of Antarctica. *Acta Palaeontol Pol* 52(4):657–674.
79. Smith AB, Zamora S (2009) Rooting phylogenies of problematic fossil taxa: a case study using cinctans (stem-group echinoderms). *Palaeontology* 52(4):803–821.
80. Tietje OE, Poschmann M (2008) Phylogeny and palaeoecology of the Adelophthalmoidea (Arthropoda: Chelicerata; Eurypterida). *J Syst Palaeontology* 6(2):237–249.
81. Tietje OE, Cuggy MB (2007) Phylogeny of the basal swimming eurypterids (Chelicerata; Eurypterida; Eurypterina). *J Syst Palaeontology* 5(3):345–356.
82. Stocker M (2010) A new taxon of phytosaur (Archosauria: Pseudosuchia) from the Late Triassic (Norian) Sonsela Member (Chinle Formation) in Arizona, and a critical reevaluation of *Leptosuchus* Case, 1922. *Palaeontology* 53(5):997–1022.
83. Sundberg F (2004) Cladistic analysis of early-middle Cambrian kochapsid trilobites (Ptychopariida). *J Paleontol* 78(5):920–940.
84. Trinajstić K, Dennis-Bryan K (2009) Phenotypic plasticity, polymorphism and phylogeny within placoderms. *Acta Zool* 90:83–102.
85. Wenwei Y, Fortey RA, Turvey ST (2006) Ontogeny and relationships of the trilobite *Pseudopetigurus* Prantl & Pribyl. *Palaeontology* 49(3):537–546.
86. Wang X (1994) Phylogenetic systematics of the Hesperocyoninae (Carnivora: Canidae). *Bull Am Mus Nat Hist* 221:1–212.
87. Wilson MV, Märss T (2009) Thelodont phylogeny revisited, with inclusion of key scale-based taxa. *Estonian Journal of Earth Sciences* 58(4):297–310.
88. Xiao-Chun W, Yen-Nien C, Tamaki S, Hsi-Yin S. (2008) *Miodontosaurus brevis* Chen et al., 2007 (Diapsida: Thalattosauria): Its postcranial skeleton and phylogenetic relationships. *Vertebrat Palasiatic* 47(1):1–20.
89. Yates A, Warren A (2000) The phylogeny of the 'higher' temnospondyls (Vertebrata: Choanata) and its implications for the monophyly and origins of the Stereospondyli. *Zool J Linn Soc* 128(1):77–121.
90. Young MT, De Andrade MB (2009) What is *Geosaurus*? Redescription of *Geosaurus giganteus* (Thalattosauria: Metriorhynchidae) from the Upper Jurassic of Bayern, Germany. *Zool J Linn Soc* 157(3):551–585.
91. Zhu M, Gai Z (2007) Phylogenetic relationships of galeaspid (Agnatha). *Front Biol China* 2(2):151–169.
92. Wang X, Tedford R, Taylor B (1999) Phylogenetic systematics of the Borophaginae (Carnivora: Canidae). *Bull Am Mus Nat Hist* 243:1–391.
93. Brusatte SL, Butler RJ, Prieto-Márquez A, Norell MA (2012) Dinosaur morphological diversity and the end-Cretaceous extinction. *Nat Commun* 3(804):1–8.
94. Adnet S, Cappetta H (2001) A palaeontological and phylogenetic analysis of squaliform sharks (Chondrichthyes: Squaliformes) based on dental characters. *Lethaia* 34(3):234–248.
95. Anderson LC, Roonpaine PD (2003) Evolution and phylogenetic relationships of Neogene Corbulidae (Bivalvia; Myoidea) of tropical America. *J Paleontol* 77(6):1086–1102.
96. Asher RJ (2007) A web-database of mammalian morphology and a reanalysis of placental phylogeny. *BMC Evol Biol* 7:108.
97. Asher RJ, et al. (2005) Stem Lagomorpha and the antiquity of Glires. *Science* 307(5712):1091–1094.
98. Beck RMD, Godthelp H, Weisbecker V, Archer M, Hand SJ (2008) Australia's oldest marsupial fossils and their biogeographical implications. *PLoS ONE* 3(3):e1858+.
99. Bertelli S, Giannini NP, Ksepka DT (2006) Redescription and phylogenetic position of the Early Miocene penguin *Parapterodytes antarcticus* from Patagonia. *Am Mus Novit* 3525:1–36.
100. Blagoderov V, Grimaldi D (2004) Fossil Sciaroidea (Diptera) in Cretaceous ambers, exclusive of Cecidomyiidae, Sciaridae, and Keroplatidae. *Am Mus Novit* 3433:1–76.
101. Blagoderov V, Grimaldi DA, Fraser NC (2007) How time flies for flies: Diverse Diptera from the Triassic of Virginia and early radiation of the order. *Am Mus Novit* 3572:1–39.
102. Blake D, Hagdorn H (2003) The Asteroidea (Echinodermata) of the Muschelkalk (Middle Triassic of Germany). *Paläontologische Zeitschrift* 77(1):23–58.
103. Brusatte SL, Benton MJ, Desjais JB, Langer MC (2010) The higher-level phylogeny of Archosauria (Tetrapoda: Diapsida). *J Syst Palaeontology* 8(1):3–47.
104. Cairns SD (1997) A generic revision and phylogenetic analysis of the Turbinoliidae (Cnidaria: Scleractinia). *Smithson Contrib Zool* 591:1–55.
105. Cairns SD (2001) A generic revision and phylogenetic analysis of the Dendrophylliidae (Cnidaria: Scleractinia). *Smithson Contrib Zool* 615:1–75.
106. Carpenter KE, Johnson GD (2002) A phylogeny of sparoid fishes (Perciformes, Percoidei) based on morphology. *Ichthyol Res* 49(2):114–127.
107. Carter JG, Campbell DC, Campbell MR. (2006) Morphological phylogenetics of the early bivalvia. *International Congress on Bivalvia: Abstracts*, eds Malchus M, Pons JM. *Org Divers Evol* 6, Electr Suppl 16.
108. Cavin L (2010) Diversity of Mesozoic semionotiform fishes and the origin of gars (Lepisosteidae). *Naturwissenschaften* 97(12):1035–1040.
109. Conrad JL (2008) Phylogeny and systematics of Squamata (Reptilia) based on morphology. *Bull Am Mus Nat Hist* 310:1–182.
110. Dayrat B, Tillier S (2002) Evolutionary relationships of euthyneuran gastropods (Mollusca): A cladistic re-evaluation of morphological characters. *Zool J Linn Soc* 135(4):403–470.
111. Deméré TA, McGowen MR, Berta A, Gates J (2008) Morphological and molecular evidence for a stepwise evolutionary transition from teeth to baleen in mysticete whales. *Syst Biol* 57(1):15–37.
112. Engel MS, Grimaldi DA, Krishna K (2009) Termites (Isoptera): Their phylogeny, classification, and rise to ecological dominance. *Am Mus Novit* 3650:1–27.
113. Estelle Bourdo N, de Ricqlès S, Jorge Cub O (2009) A new Transantarctic relationship: morphological evidence for a Rheidae-Dromaiidae-Casuariidae clade (Aves, Palaeognathae, Ratitae). *Zool J Linn Soc* 156(3):641–663.
114. Evander RL (1989) *The Evolution of Perissodactyls*, eds Prothero DR, Schoch RM (Oxford Univ Press, Oxford), pp 109–127.
115. Gaffney ES, Tong H, Meylan PA (2006) Evolution of the side-necked turtles: The families Bothremyidae, Euraxemyidae, and Aripemyidae. *Bull Am Mus Nat Hist* 300:1–698.
116. Gaubert P, Wozencraft WC, Cordeiro-Estrela P, Veron G (2005) Mosaics of convergences and noise in morphological phylogenies: What's in a viverrid-like carnivore? *Syst Biol* 54(6):865–894.
117. Grande L, Bemis WE (1998) A comprehensive phylogenetic study of Amiidi fishes (Amiidae) based on comparative skeletal anatomy. An empirical search for interconnected patterns of natural history. *J Vertr Paleontol* (Suppl 1):1–696.
118. Grimaldi D (2003) A revision of Cretaceous mantises and their relationships, including new taxa (Insecta: Dictyoptera: Mantodea). *Am Mus Novit* 3412:1–47.
119. Grimaldi DA, Agosti D, Carpenter JM. (1997) New and rediscovered primitive ants (Hymenoptera: Formicidae) in Cretaceous amber from New Jersey, and their phylogenetic relationships. *Am Mus Novit* 3208:1–43.
120. Haasi DM (2000) Phylogenetic relationships among Nassariid gastropods. *J Paleontol* 74(5):839–852.
121. Harper EM, Hide EA, Morton B (2000) Relationships between the extant Anomalodesmata: A cladistic test. *Geol Soc Lond Spec Publ* 177(1):129–143.
122. Kerr AM, Kim J (2001) Phylogeny of Holothuroidea (Echinodermata) inferred from morphology. *Zool J Linn Soc* 133:63–81.
123. Klug S (2010) Monophyly, phylogeny and systematic position of the Synechodontiformes (Chondrichthyes, Neoselachii). *Zool Scr* 39(1):37–49.
124. Kroh A, Smith AB (2010) The phylogeny and classification of post-Palaeozoic echinoids. *J Syst Palaeontology* 8(2):147–212.
125. Monari S (2009) Phylogeny and biogeography of pholadid bivalve *Barnea* (Anchomasa) with considerations on the phylogeny of Pholadoidea. *Acta Palaeontol Pol* 54(2):315–335.
126. Phillips MJ, Bennett TH, Lee MSY (2009) Molecules, morphology, and ecology indicate a recent, amphibious ancestry for echinids. *Proc Natl Acad Sci USA* 106(40):17089–17094.
127. Pitts JP, Wasbauer MS, Von Dohlen CD (2006) Preliminary morphological analysis of relationships between the spider wasp subfamilies (Hymenoptera: Pompilidae): Revisiting an old problem. *Zool Scr* 35(1):63–84.

128. Ponder WF, Lindberg DR (1997) Towards a phylogeny of gastropod molluscs: An analysis using morphological characters. *Zool J Linn Soc* 119(2):83–265.
129. Rehn AC (2003) Phylogenetic analysis of higher-level relationships of Odonata. *Syst Entomol* 28(2):181–240.
130. Ren D, et al. (2009) A probable pollination mode before angiosperms: Eurasian, long-proboscid scorpionflies. *Science* 326(5954):840–847.
131. Reynolds PD, Okusu A (1999) Phylogenetic relationships among families of the Scaphopoda (Mollusca). *Zool J Linn Soc* 126(2):131–154.
132. Rybczynski N (2007) Castorid phylogenetics: Implications for the evolution of swimming and tree-exploitation in beavers. *J Mamm Evol* 14(1):1–35.
133. Schnabel KE, Ahyong ST, Maas EW (2011) Galatheoidea are not monophyletic - molecular and morphological phylogeny of the squat lobsters (Decapoda: Anomura) with recognition of a new superfamily. *Mol Phylogenet Evol* 58(2):157–168.
134. Schneider J (2002) Phylogeny of cardiid bivalves (cockles and giant clams): Revision of the Cardiinae and the importance of fossils in explaining disjunct biogeographical distributions. *Zool J Linn Soc* 136(3):321–369.
135. Shultz JW (2007) A phylogenetic analysis of the arachnid orders based on morphological characters. *Zool J Linn Soc* 150(2):221–265.
136. Smith A (1995) Ophiroid phylogeny and higher taxonomy: Morphological, molecular and palaeontological perspectives. *Zool J Linn Soc* 114(2):213–243.
137. Spaulding M, O'Leary MA, Gatesy J (2009) Relationships of Cetacea (Artiodactyla) among mammals: Increased taxon sampling alters interpretations of key fossils and character evolution. *PLoS ONE* 4(9):e7062.
138. Tedford RH, Wang X, Taylor BE (2009) Phylogenetic systematics of the North American fossil Caninae (Carnivora: Canidae). *Bull Am Mus Nat Hist* 325:1–218.
139. Vermeij GJ, Carlson SJ (2000) The muricid gastropod subfamily Rapaninae: Phylogeny and ecological history. *Paleobiology* 26(1):19–46.
140. Waller TR (2006) Phylogeny of families in the Pectinoidea (Mollusca: Bivalvia): Importance of the fossil record. *Zool J Linn Soc* 148:313–342.
141. Wesley-Hunt GD, Flynn JJ (2005) Phylogeny of the Carnivora: Basal relationships among the Carnivoramorphan, and assessment of the position of 'Miacoidea' relative to Carnivora. *J Syst Palaeontology* 3(1):1–28.
142. Worthy TH (2009) Descriptions and phylogenetic relationships of two new genera and four new species of Oligo-Miocene waterfowl (Aves: Anatidae) from Australia. *Zool J Linn Soc* 156(2):411–454.
143. Young MT, De Andrade MB (2009) What is *Geosaurus*? Redescription of *Geosaurus giganteus* (Thalattosuchia: Metriorhynchidae) from the Upper Jurassic of Bayern, Germany. *Zool J Linn Soc* 157(3):551–585.
144. Ogg GJ, Ogg G, Gradstein MF (2008) The Concise Geologic Time Scale. *Geol Mag* 147: 156–177.
145. Gradstein FM, Ogg JG, Smith AG (2004) *A Geologic Time Scale 2004* (Cambridge Univ Press, Cambridge, UK).
146. Foth C, Brusatte SL, Butler RJ (2012) Do different disparity proxies converge on a common signal? Insights from the cranial morphometrics and evolutionary history of Pterosauria (Diapsida: Archosauria). *J Evol Biol* 25(5):904–915.
147. R Development Core Team (2010) *R: A Language and Environment for Statistical Computing* (R Foundation for Statistical Computing, Vienna).
148. Valentine JW, Collins AG, Meyer CP (1994) Morphological complexity increase in metazoans. *Paleobiology* 20(2):131–142.
149. Sepkoski JJ (2002) A compendium of fossil marine animal genera. *Bull Am Paleontol* 363:1–560.
150. Benton MJ (1993) *The Fossil Record 2* (Chapman & Hall, London).
151. Smith AB, Kroh A. (2011) The Echinoid Directory. Available at [www.nhm.ac.uk/research-curation/projects/echinoid-directory](http://www.nhm.ac.uk/research-curation/projects/echinoid-directory). Accessed May 19, 2011.
152. Mitchell C (1987) Evolution and phylogenetic classification of the Diplograptacea. *Palaeontology* 30(2):353–405.
153. Harper EM, Taylor JD, Crame JA (2000) *Evolutionary Biology of the Bivalvia*. (Geological Soc, London).
154. Body RL (2000) The NatureMapping Program. Available at <http://naturemapping.foundations.org/natmap/mollusks/>. Accessed September 16, 2011.
155. Wilson DE, Reeder DM (2005) *Mammal Species of the World: A Taxonomic and Geographic Reference* (Johns Hopkins Univ Press, Baltimore).
156. Fortelius M (2011) New and Old Worlds. Available at [www.helsinki.fi/science/now/](http://www.helsinki.fi/science/now/). Accessed November 27, 2011.
157. Eades DC, Otte D, Cigliano MM, Braun H (2011) Orthoptera Species File Online. Available at <http://Orthoptera.SpeciesFile.org>. Accessed May 13, 2011.
158. Ponder W, Lindberg DR (2008) *Phylogeny and Evolution of the Mollusca* (Univ of California Press, Berkeley, CA).
159. Sprinkle J, Kier PM (1987) *Fossil Invertebrates*, eds Boardman RS, Cheetham AH, Rowell AJ (Blackwell Scientific, Palo Alto, CA).
160. Smith AS (2011) The Plesiosaur Directory. Available at [www.plesiosauria.com/](http://www.plesiosauria.com/). Accessed February 18, 2011.
161. Uetz P (2011) The Reptile Database. Available at [www.reptile-database.org](http://www.reptile-database.org). Accessed June 14, 2011.
162. Brands SJ 1989–2005) *Systema Naturae 2000*. Available at <http://sn2000.taxonomy.nl/>. Accessed February 21, 2011.
163. Benton MJ (2000) *Vertebrate Palaeontology* (Blackwell Science, Oxford).
164. Carroll RL (1988) *Vertebrate Paleontology and Evolution* (Freeman, New York).
165. Kroh A, Mooi R (2011) World Echinoidea Database version 2.0. Available at [www.marinespecies.org/echinoidea](http://www.marinespecies.org/echinoidea). Accessed May 19, 2011.
166. Evenhuis NL (1994) *Catalogue of the Fossil Flies of the World (Insecta: Diptera)* (Backhuys Publishers, Kerkwerpe, The Netherlands).
167. Mah CL (2009) World Asteroidea database. Available at [www.marinespecies.org/asteroidea](http://www.marinespecies.org/asteroidea). Accessed April 20, 2011.
168. Forrest R (2011) The Plesiosaur site. Available at [www.plesiosaur.com/](http://www.plesiosaur.com/). Accessed February 18, 2011.
169. Schmidt R (2011) International Bryozoology Association. Available at [www.bryozoa.net/index.html](http://www.bryozoa.net/index.html). Accessed June 15, 2011.
170. Kullman P (2011) GONIAT Online Paleozoic Ammonoid Database System. Available at [www.goniat.org/](http://www.goniat.org/). Accessed June 16, 2011.
171. Bervoets F (2011) DinoData. Available at [www.dinodata.org/](http://www.dinodata.org/). Accessed January 17, 2011.
172. Brake I (2011) Fungus Gnats Online. Available at <http://sciaroidea.info/>. Accessed April 8, 2011.
173. Slieker F (2011) Natural History Museum Rotterdam. Available at [www.nmr-pics.nl/](http://www.nmr-pics.nl/). Accessed April 13, 2011.
174. Wills MA (1998) Crustacean disparity through the Phanerozoic: Comparing morphological and stratigraphic data. *Biol J Linn Soc Lond* 65(4):455–500.
175. Wills MA, Briggs DEG, Fortey RA (1994) Disparity as an evolutionary index: A comparison of Cambrian and Recent arthropods. *Paleobiology* 20(2):90–130.
176. Cailliez F (1983) The analytical solution of the additive constant problem. *Psychometrika* 48(2):305–308.
177. Shen B, Dong L, Xiao S, Kowalewski M (2008) The Avalon explosion: Evolution of Ediacaran morphospace. *Science* 319(5859):81–84.
178. Huntley J, Xiao S, Kowalewski M (2006) 1.3 Billion years of acritarch history: An empirical morphospace approach. *Precambrian Res* 144(1):52–68.
179. Foote M (1991) Morphological and taxonomic diversity in clade's history: The blastoid record and stochastic simulations. *Contrib Mus Paleontol* 28(6):101–140.
180. Efron B (1982) *The Jackknife, the Bootstrap, and Other Resampling Plans* (Natl Sci Foundation, Philadelphia).
181. Uhen MD (1996) An evaluation of clade-shape statistics using simulations and extinct families of mammals. *Paleobiology* 22(1):8–22.
182. Gould SJ, Gilinsky NL, German RZ (1987) Asymmetry of lineages and the direction of evolutionary time. *Science* 236(4807):1437–1441.
183. Gould SJ, Raup DM, Jr., Sepkoski JJ, Schopf TJM, Simberloff DS (1977) The shape of evolution: A comparison of real and random clades. *Paleobiology* 3(1):23–40.
184. Kitchell JA, Macleod N (1988) Macroevolutionary interpretations of symmetry and synchronicity in the fossil record. *Science* 240(4856):1190–1193.
185. Archie JW (1989) A Randomization test for phylogenetic information in systematic data. *Syst Zool* 38(3):239–252.
186. Archie JW (1989) Homoplasy excess ratios -new indexes for measuring levels of homoplasy in phylogenetic systematics and a critique of the consistency index. *Syst Zool* 38(3):253–269.
187. Archie JW (1996) *Homoplasy: The Recurrence of Similarity in Evolution*, eds Sanderson MJ, Hufford L (Academic, Waltham, MA), pp. 153–188.
188. Goloboff P, Farris S, Nixon K (2000) (published by the authors, Tucumán, Argentina.).
189. Gavrilets S (1999) Dynamics of clade diversification on the morphological hypercube. *Proc R Soc Lond B Biol Sci* 266(1421):817–824.

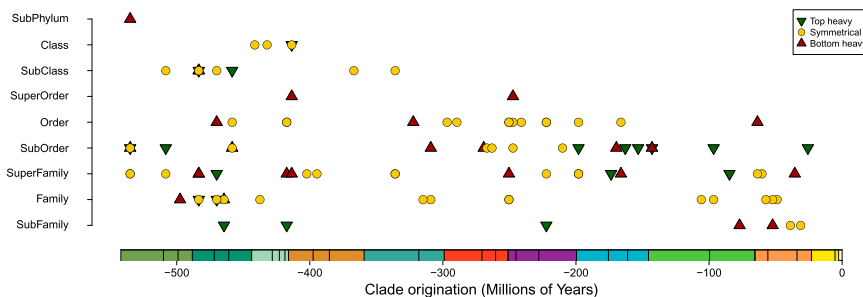

Fig. S1. Scatter plot of clade rank against time of clade origination. Dark red, significantly bottom-heavy ( $CG_{scaled} < CG_i$  at  $P < 0.05$ ); dark green, significantly top-heavy ( $CG_{scaled} > CG_i$  at  $P < 0.05$ ); yellow; clades that are not significantly bottom- or top-heavy.

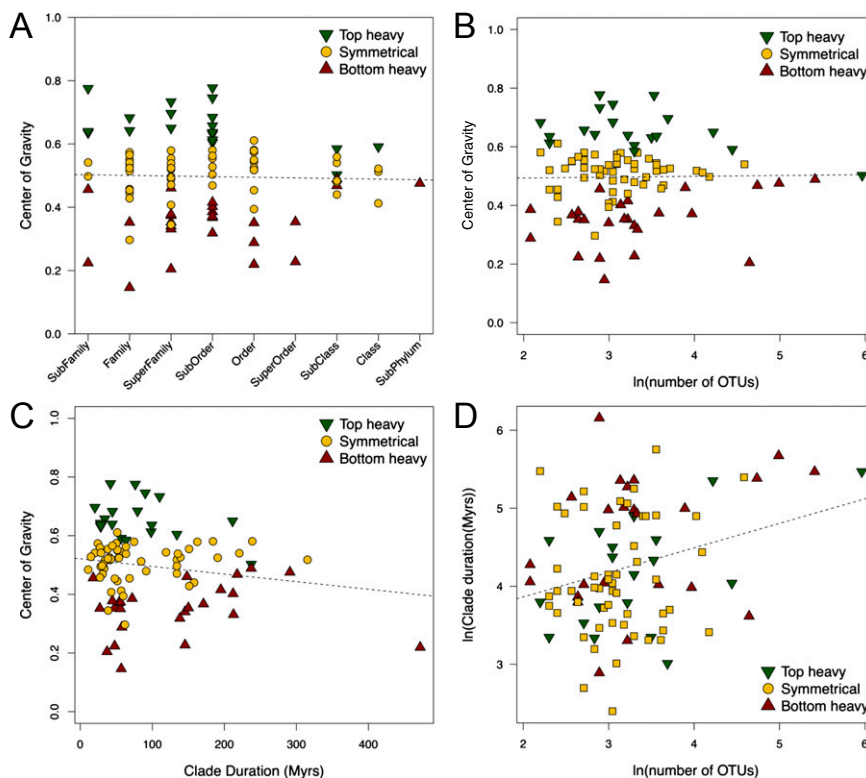

Fig. S2. There is no correlation between the CG of clades and either the taxonomic level of their constituent OTUs, or the duration of the clade. (A) Scatter plot of clade CG against median clade rank ( $\rho = -0.027, P = 0.791$ ). (B) Scatter plot of clade CG against  $\ln(\text{number of OTUs})$  ( $\rho = 0.063, P = 0.535$ ). (C) Scatter plot of clade CG against clade duration [millions of years (Myrs)] ( $\rho = -0.139, P = 0.172$ ). (D) Scatter plot of  $\ln(\text{clade duration, Myrs})$  against  $\ln(\text{number of OTUs})$  ( $\rho = 0.2241, P = 0.0265$ ). Dark red, significantly bottom-heavy ( $CG_{scaled} < CG_i$  at  $P < 0.05$ ); dark green, significantly top-heavy ( $CG_{scaled} > CG_i$  at  $P < 0.05$ ); yellow, clades that are not significantly bottom- or top-heavy.



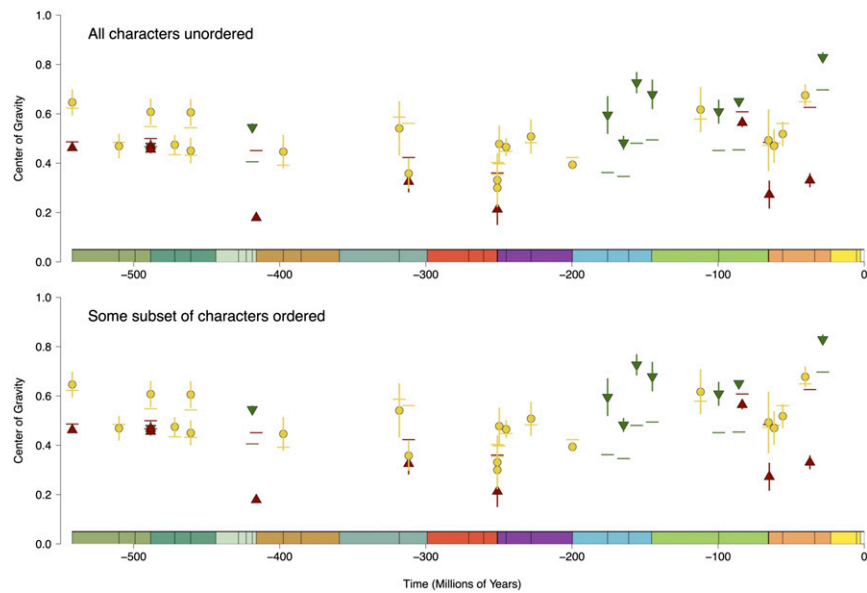

**Fig. S3.** Ordering character states has a very small effect upon disparity calculations. Of the 98 clades analyzed, 38 included information on the ordering of one or more characters. For this subset of 38 clades, the analysis was run with all character states unordered (*Upper*), and with some states ordered as specified in the original publication (*Lower*). Dark red, significantly bottom-heavy ( $CG_{scaled} < CG_i$ ; at  $P < 0.05$ ); dark green, significantly top-heavy ( $CG_{scaled} > CG_i$ ; at  $P < 0.05$ ); yellow, clades that are not significantly bottom- or top-heavy.

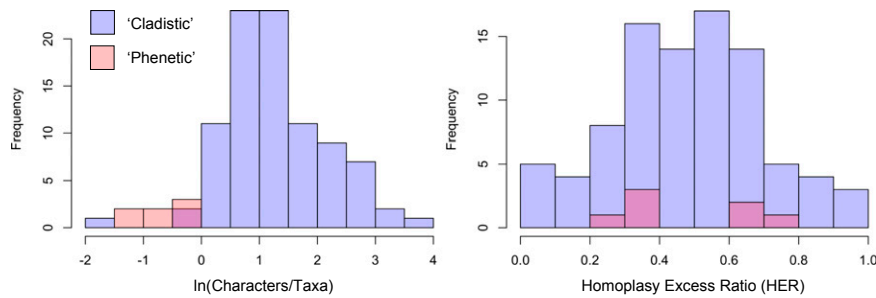

**Fig. S4.** The distributions of data matrix "shape" (the ratio of the number of characters to the number of taxa) and homoplasy (indexed here by the homoplasy excess ratio, HER) for the 91 cladistic (blue) and 7 phenetic (pink) matrices used in the main study. Cladistic matrices are defined as those compiled with the express purpose of inferring a phylogeny, whereas phenetic matrices are those compiled without this purpose in mind.

**Dataset S1.** Description of the 98 extinct and relict and 53 living clades analyzed, along with summary statistics and test results

[Dataset S1](#)

**Dataset S2.** Morphological and stratigraphic data for 98 extinct/relict and 53 extant clades

[Dataset S2](#)

**Dataset S3.** R code for disparity and resampling analyses

[Dataset S3](#)
